# Supplementary material for: Landscape Ecological Risk Assessment under Multiple Indicators
Source: MDPI journal article supplement (doi:10.3390/land10070739), 2021-07-14
Supplement: s1 [file s1]

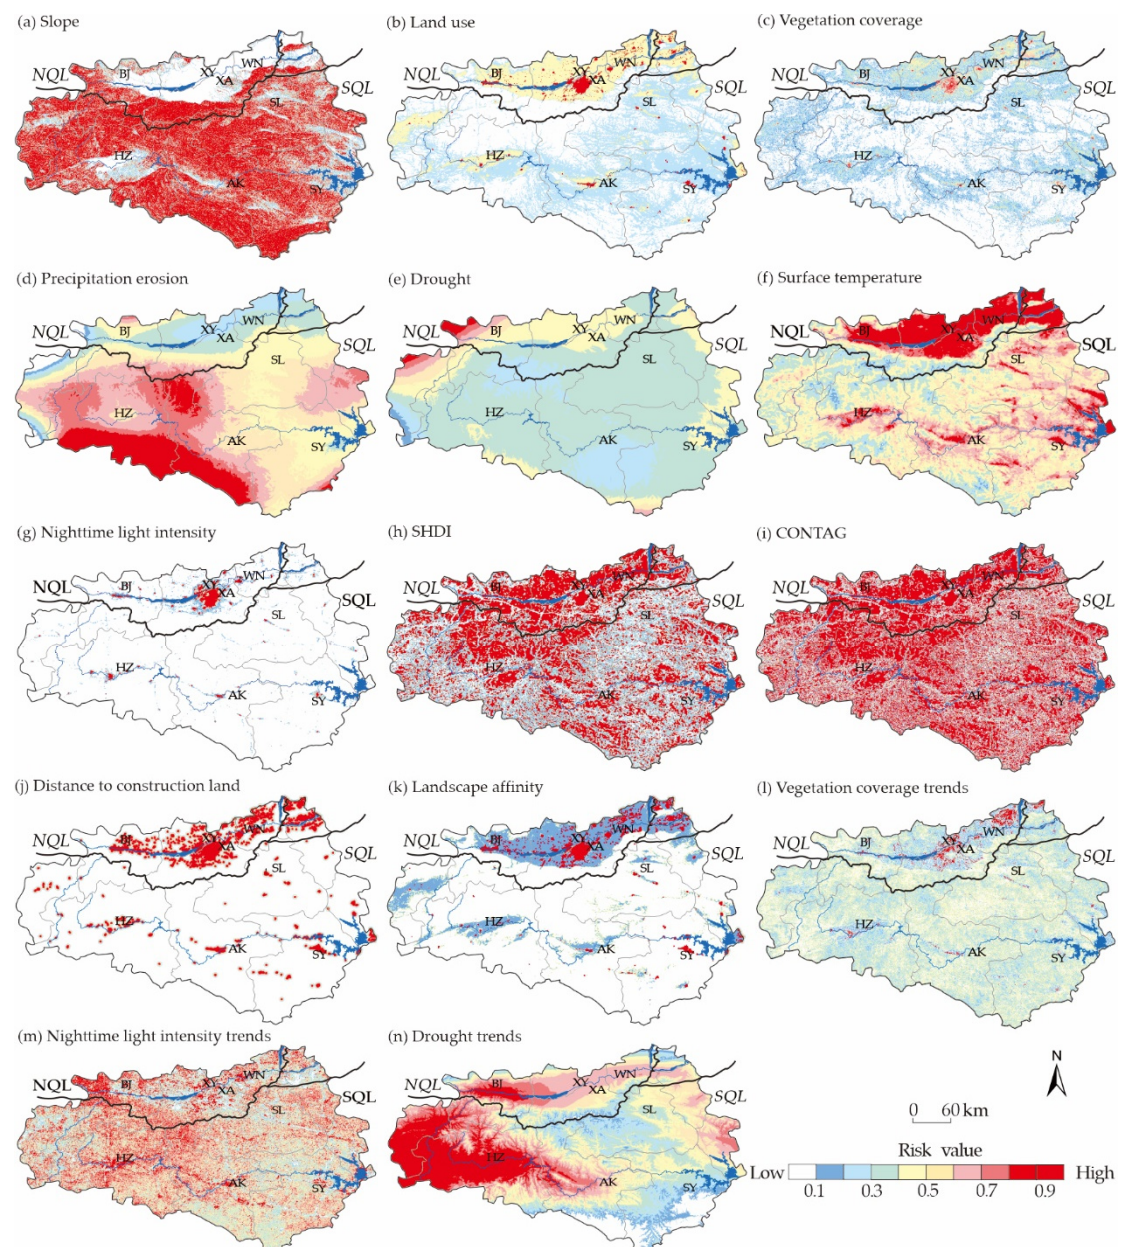

**Figure S1.** Spatial pattern of different indicators in the LERA index system in the north and south of Qinling Mountains. XA is abbreviation for Xi'an city, BJ is for Baoji city, XY is for Xianyang city, WN is for Weinan city, SL is for Shangluo city, HZ is for Hanzhong city, AK is for Ankang city, SY is for Shiyan city.

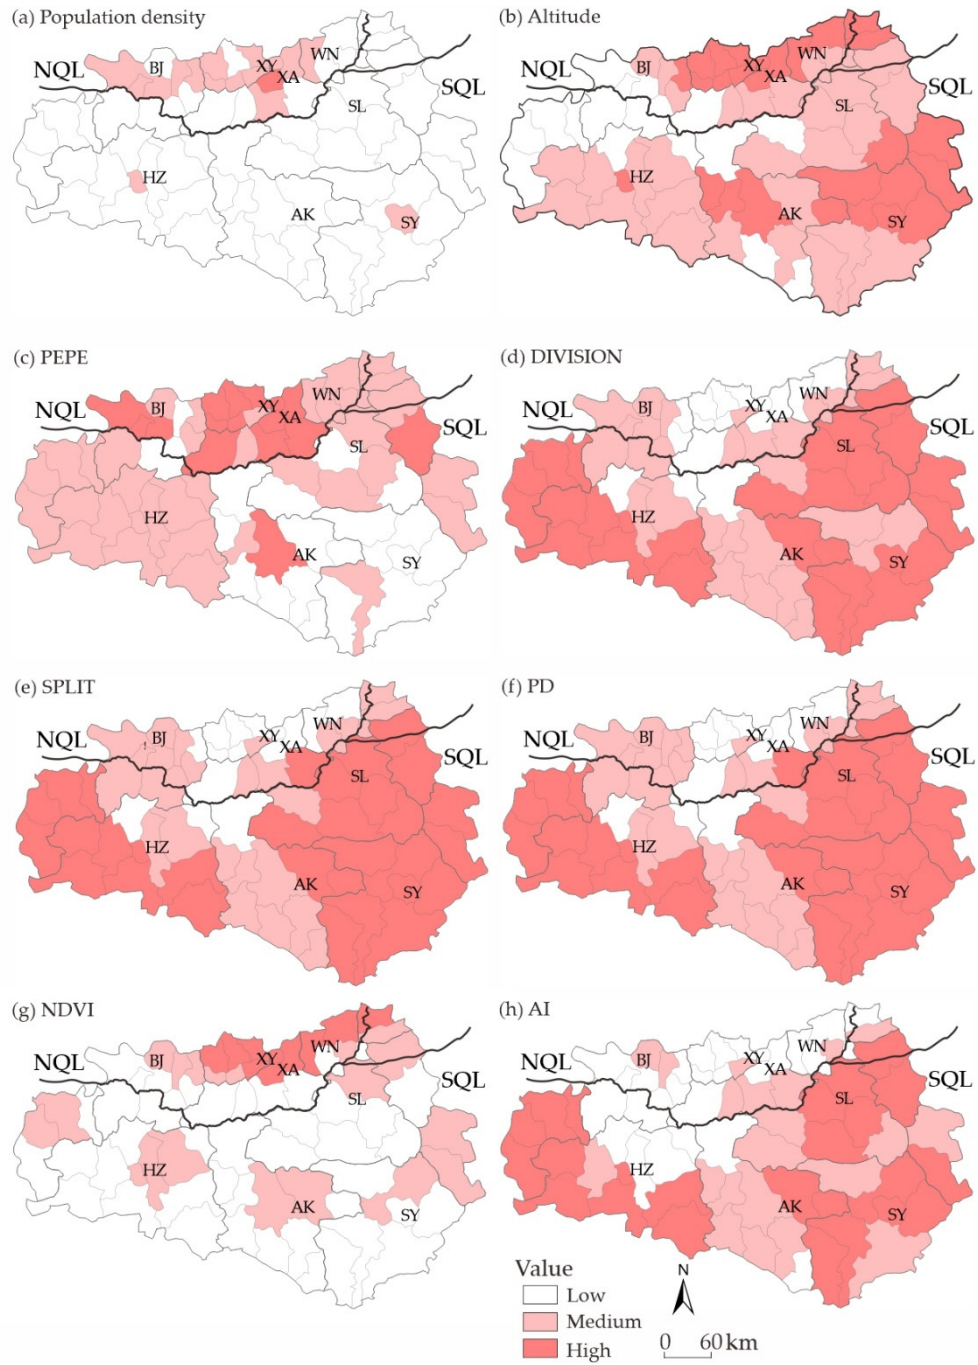

**Figure S2.** Spatial pattern of the driving factors of the landscape ecological risk in the north and south of Qinling Mountains. XA is abbreviation for Xi'an city, BJ is for Baoji city, XY is for Xianyang city, WN is for Weinan city, SL is for Shangluo city, HZ is for Hanzhong city, AK is for Ankang city, SY is for Shiyan city.
